# Supplementary material
Source: PubMed Central journal article supplement (PMC1934566)
Supplement: JCI0731990sd.pdf [file JCI0731990sd.pdf]

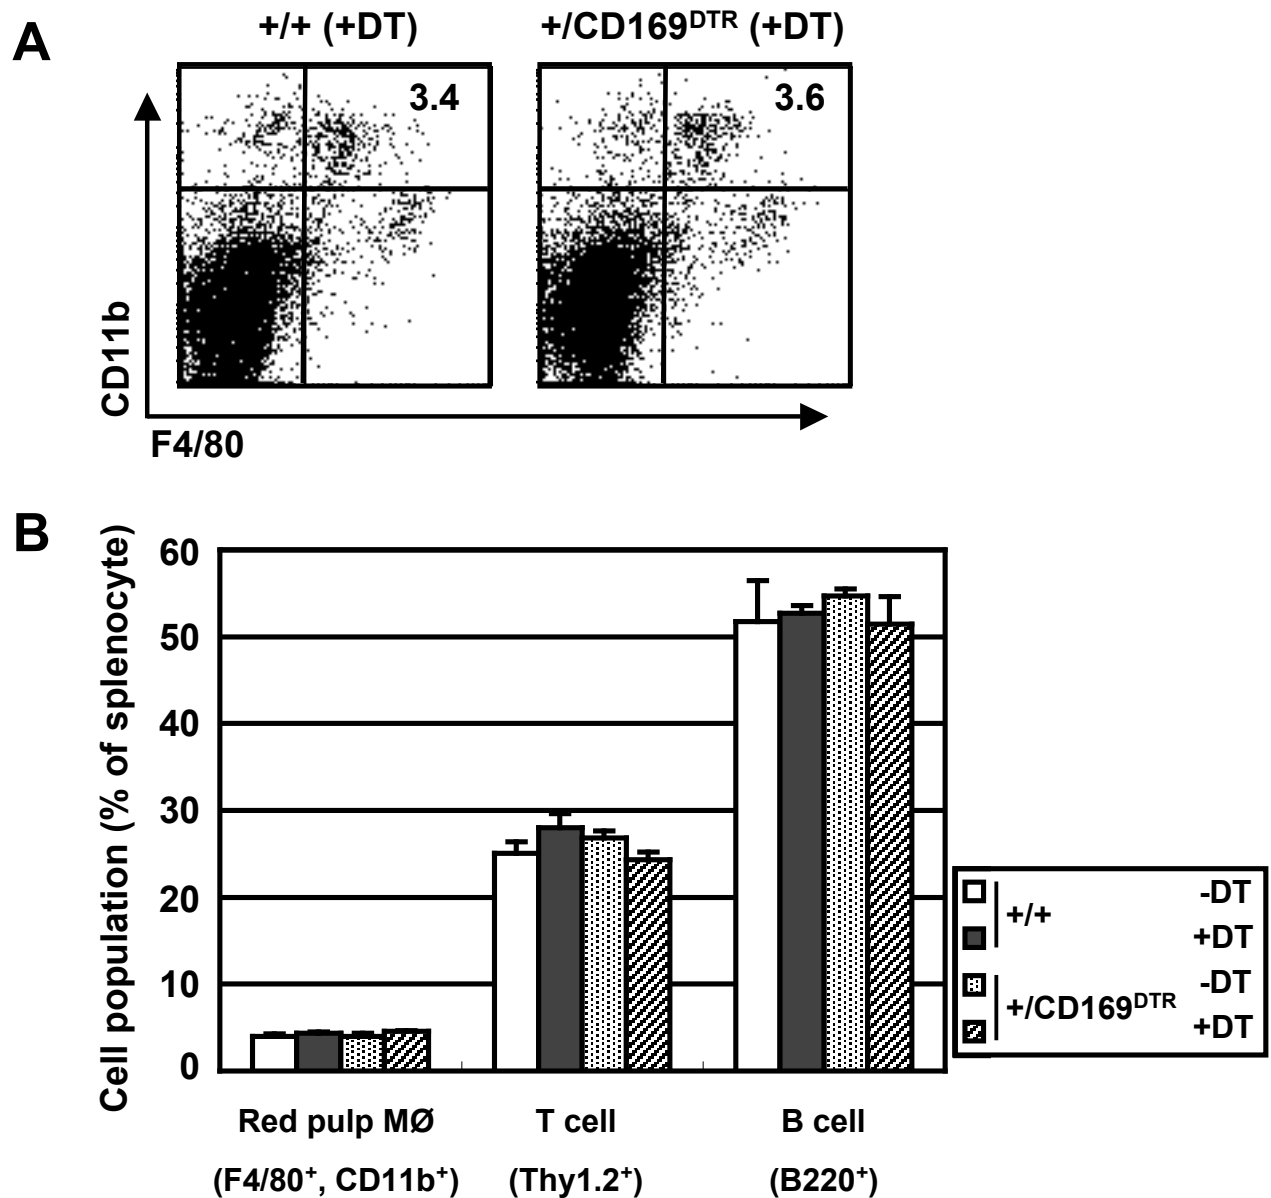

**Supplemental Figure. 1: Red pulp macrophage, T cell and B cell was not affected by DT treatment in CD169-DTR mice.**

(A, B) Wild-type (+/+) or CD169-DTR (+/CD169<sup>DTR</sup>) mice were treated with or without 10  $\mu\text{g}/\text{kg}$  of DT. Four days later, Single-cell suspensions of splenocytes were stained with F4/80 and CD11b (red pulp macrophage), Thy1.2 (T cell) and B220 (B cell), and analyzed by flow cytometry.

## Supplemental Figure 1
